# Supplementary material
Source: PubMed Central journal article supplement (PMC2147719)
Supplement: NIHMS35582-supplement-Supp__Data.pdf [file NIHMS35582-supplement-Supp__Data.pdf]

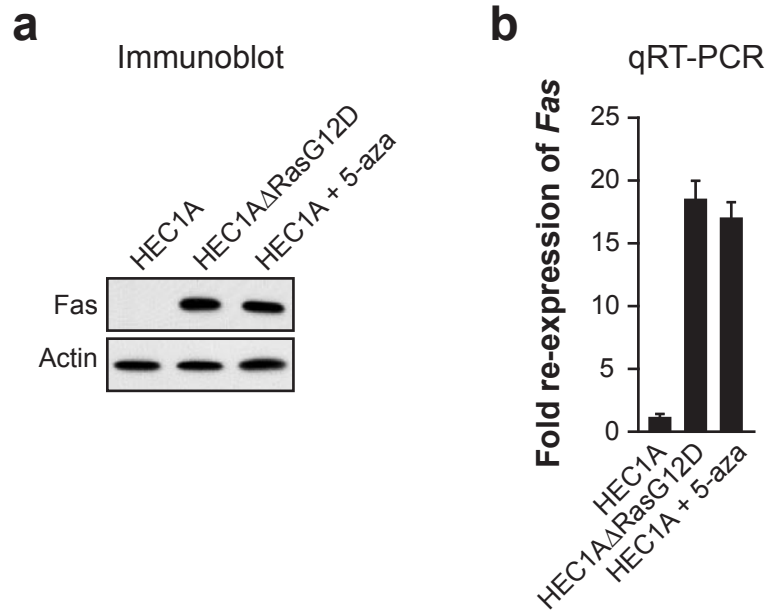

**Supplementary Figure 1 Analysis of *Fas* gene expression in human endometrial cancer HEC1A cells.** **a**, Immunoblot analysis. HEC1A cells contain one normal and one activated *ras* allele (RasG12D). In HEC1A $\Delta$ RasG12D cells, the activated *ras* allele has been deleted<sup>1</sup>. *Fas* expression was monitored in HEC1A cells, in HEC1A $\Delta$ RasG12D cells and in HEC1A cells treated with 5-aza. Actin was monitored as a loading control. **b**, Quantitative real-time RT-PCR (qRT-PCR) analysis monitoring *Fas* expression. Error bars indicate standard error.

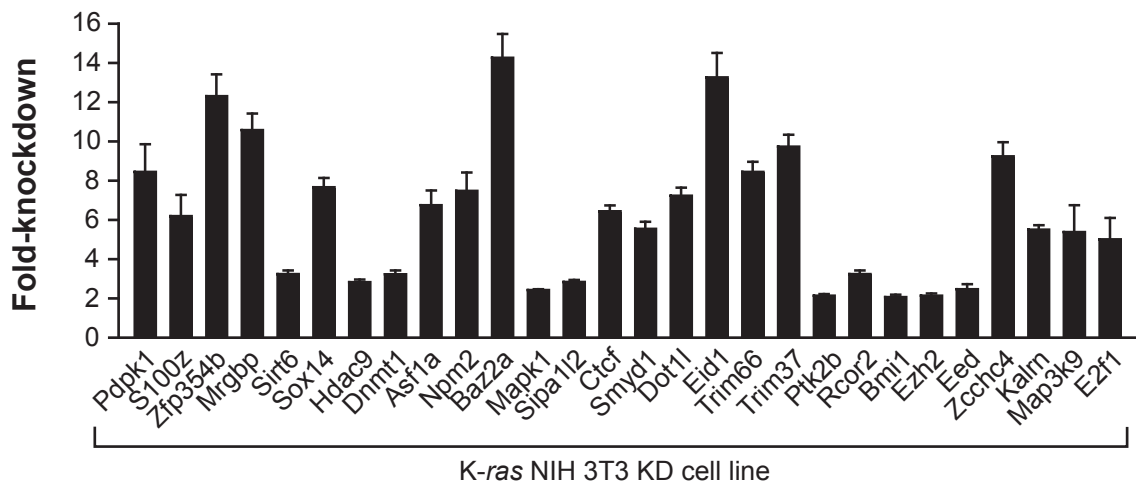

**Supplementary Figure 2 Analysis of target gene expression in the K-ras NIH 3T3 KD cell lines.** Quantitative real-time RT-PCR (qRT-PCR) was used to analyze target gene expression in each of the 28 K-ras NIH 3T3 KD cell lines. Error bars indicate standard error.

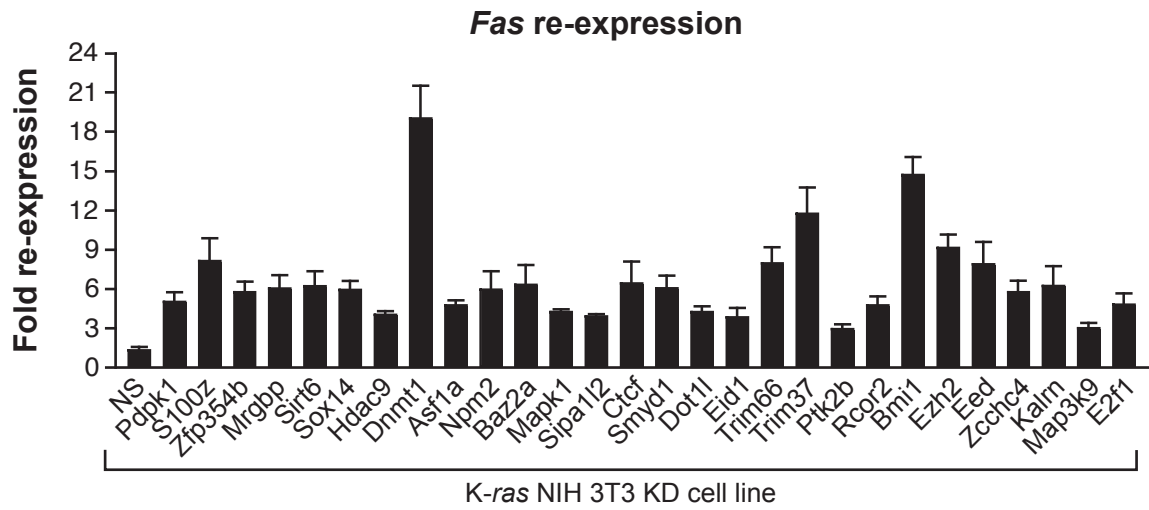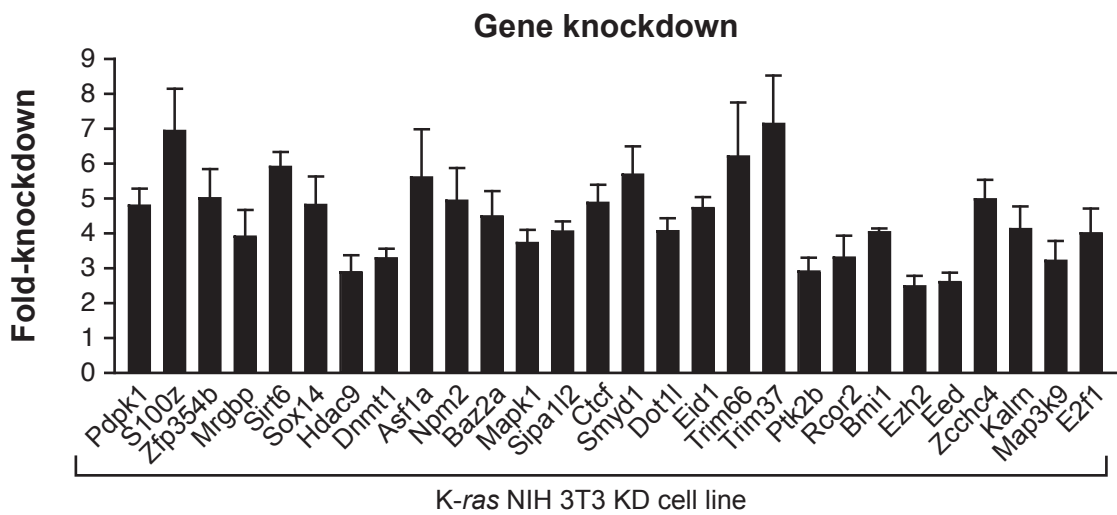

**Supplementary Figure 3 Confirmation of all 28 RESEs using a second, unrelated shRNA directed against the target gene.** qRT-PCR analysis shows that a second, unrelated shRNA directed against the target gene also resulted in *Fas* re-expression (top) and decreased expression of the target gene (bottom). NS, nonsilencing shRNA. Error bars indicate standard error.

**a**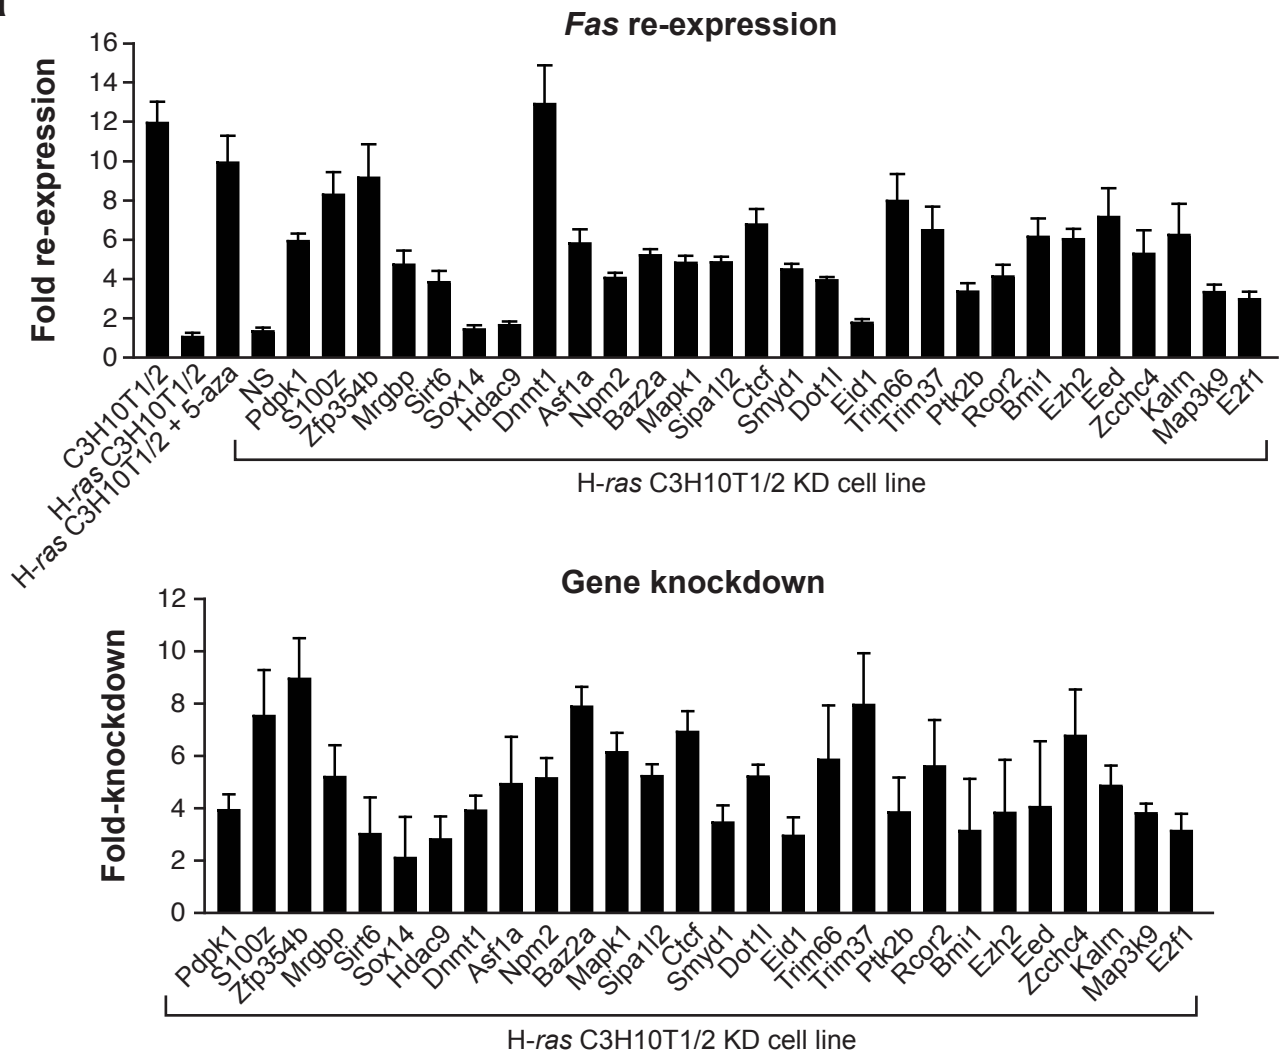**b**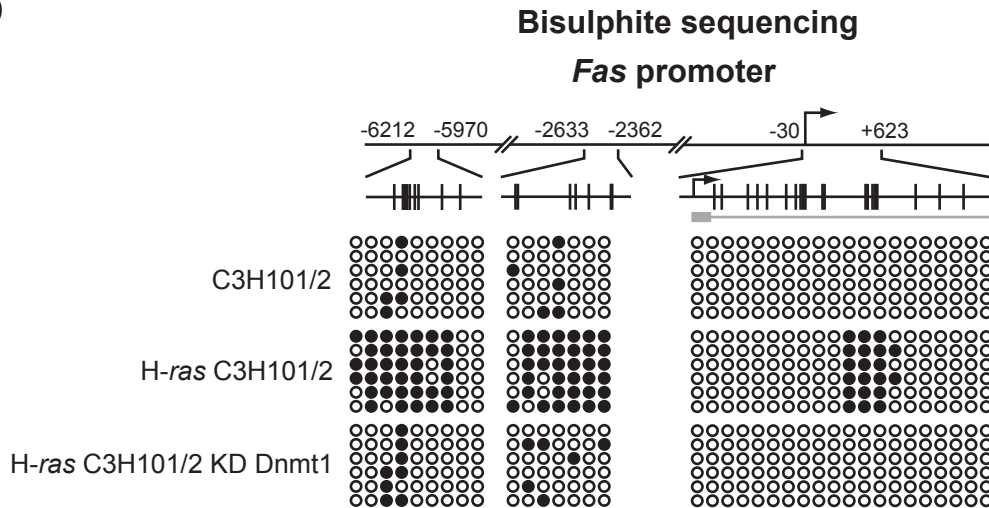

**Supplementary Figure 4 Knockdown of the 28 RESEs in a second, unrelated cell line, H-ras transformed murine C3H10T1/2 fibroblasts, results in *Fas* re-expression.** a, qRT-PCR analysis reveals that knockdown of each of the 28 RESEs resulted in *Fas* re-expression (top) and decreased expression of the target gene (bottom) in C3H10T1/2 cells. NS, nonsilencing shRNA. Error bars indicate standard error. b, Bisulphite sequencing analysis of *Fas*. Each circle represents a CpG dinucleotide. Open (white) circles denote unmethylated CpG sites; filled (black) circles indicate methylated CpG sites. Each row represents a single clone; for each cell line, six clones were sequenced. The regions of the promoter analyzed are shown. The position of the transcription start-site is indicated by the arrow, and positions of the CpG dinucleotides are shown to scale by vertical lines.

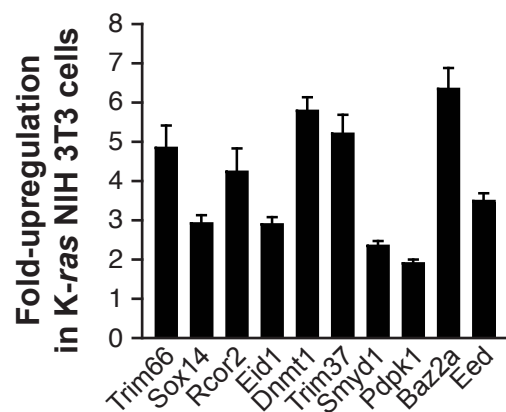

**Supplementary Figure 5 Several RESEs are upregulated at the transcriptional level in K-ras NIH 3T3 cells.** Quantitative real-time RT-PCR (qRT-PCR) was used to analyze RESE gene expression in K-ras NIH 3T3 cells compared to NIH 3T3 cells. Values are expressed as fold upregulation in K-ras NIH 3T3 cells relative to expression in NIH 3T3 cells. Error bars indicate standard error.

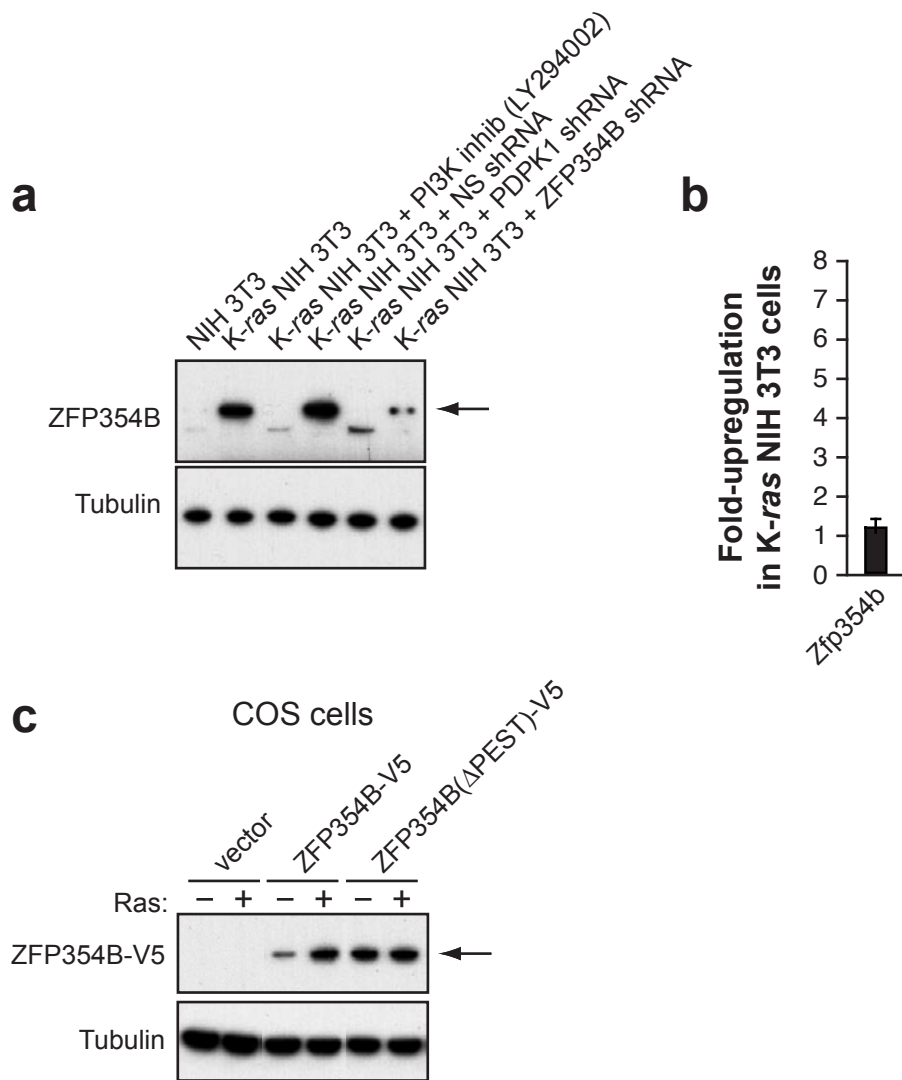

**Supplementary Figure 6 ZFP354B is upregulated at the post-transcriptional level by K-Ras.**

**a**, Immunoblot analysis showing up-regulation of ZFP354B protein expression in K-ras NIH 3T3 cells compared to NIH 3T3 cells. Addition of the phosphoinositide-3 kinase (PI3K) inhibitor LY294002 prevented upregulation of ZFP354B; PI3K is a downstream effector of Ras. ZFP354B upregulation was also abrogated upon treatment with an shRNA directed against the kinase PDPK1, a RESE (see Table 1) and known downstream effector of Ras, or ZFP354B itself, but not a nonsilencing (NS) control shRNA. Endogenous ZFP354B was monitored using an anti-ZFP354B antibody, and tubulin was monitored as a loading control using an anti-tubulin antibody.

**b**, Quantitative real-time RT-PCR (qRT-PCR) was used to analyze *Zfp354b* gene expression in K-ras NIH 3T3 cells compared to NIH 3T3 cells. The results reveal that *Zfp354b* is not transcriptionally upregulated in K-ras NIH 3T3 cells compared to NIH 3T3 cells. Error bars indicate standard error.

**c**, Immunoblot analysis. Plasmids expressing activated K-Ras and/or C-terminal V5-tagged ZFP354B or a mutant derivative lacking the N-terminal PEST sequence [ZFP354B(ΔPEST)-V5] were cotransfected into COS cells and 36 hours later cells were harvested for immunoblot analysis. ZFP354B was monitored using an anti-V5 antibody, and tubulin was monitored as a loading control using an anti-tubulin antibody. The results show that ZFP354B protein levels increased in the presence of Ras, and that this increase depended on the presence of the PEST sequence, an element known to be involved in regulated protein stability.

### Methyl-cytosine ChIP (MeDIP)

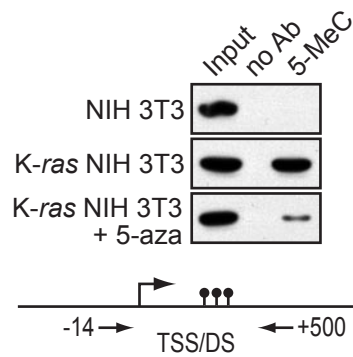

**Supplementary Figure 7 Methylated DNA immunoprecipitation (MeDIP) assay of the *Fas* promoter.** The primer pairs used in the analysis correspond to the transcription start-site/downstream (TSS/DS) region as shown in the schematic.

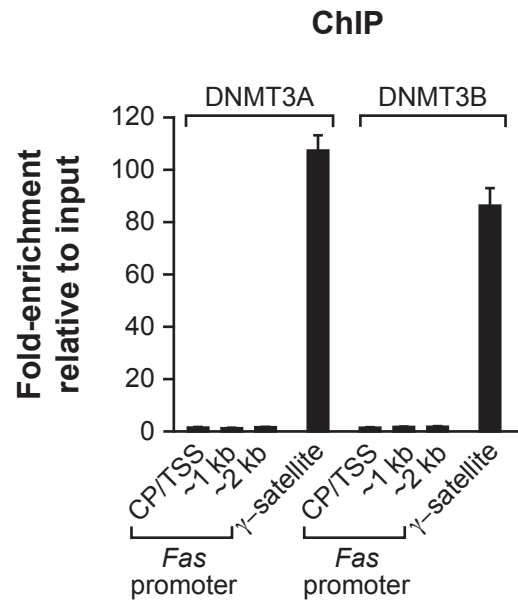

**Supplementary Figure 8 DNA methyltransferases DNMT3A and DNMT3B do not detectably associate with the *Fas* promoter.** Chromatin immunoprecipitation (ChIP) monitoring *Fas* promoter occupancy of DNMT3A and DNMT3B at the CP/TSS, ~1 kb upstream of the TSS, ~2 kb upstream of the TSS. As a control, binding of DNMT3A and DNMT3B was also monitored at the gamma satellite region, a known target of DNMT3A and DNMT3B<sup>2</sup>. Values are expressed as the fold-enrichment relative to input, and have been corrected for background. Error bars indicate standard error.



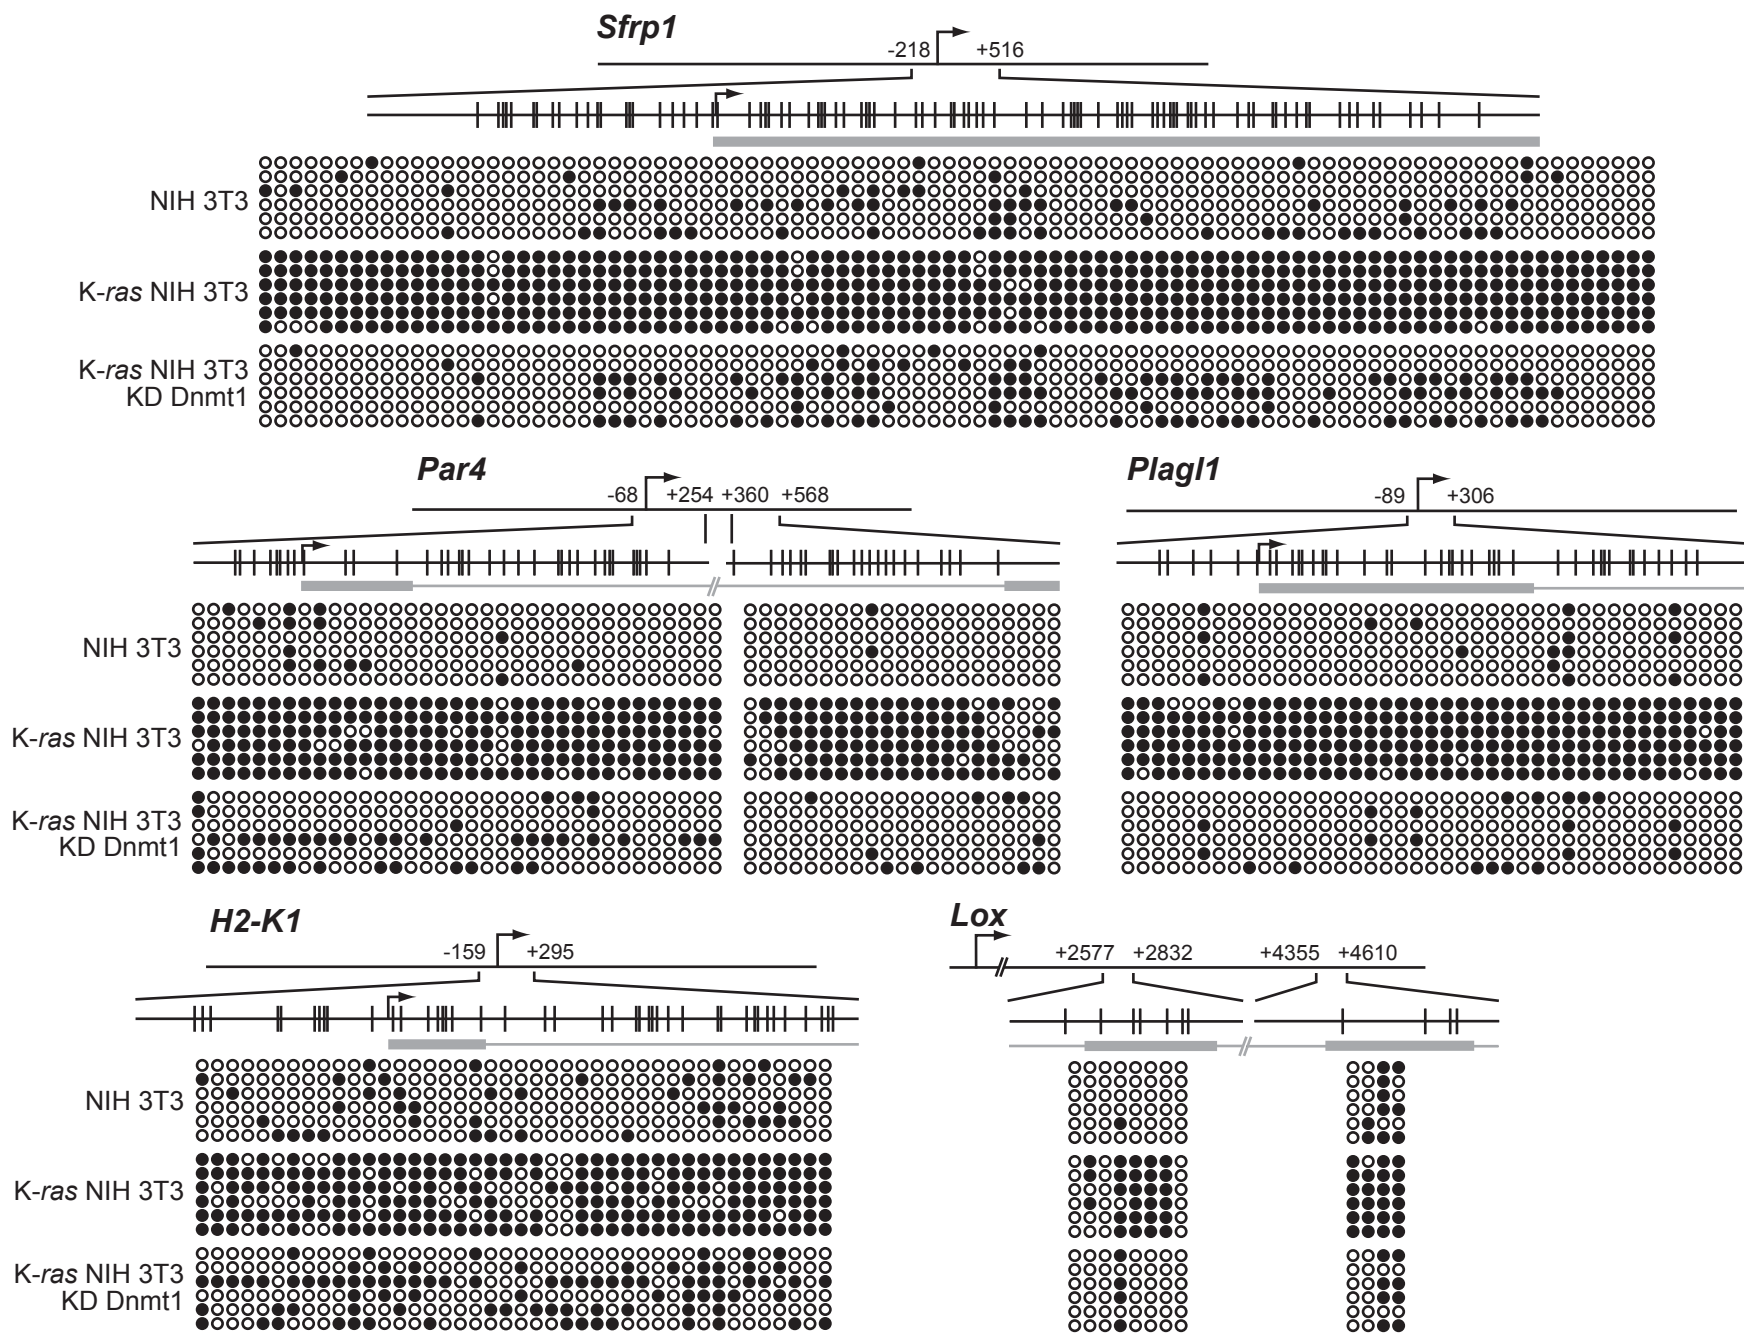

**Supplementary Figure 9** Hypermethylation of *Sfrp1*, *Par4*, *Plag1*, *H2-K1*, and *Lox* in *K-ras* NIH 3T3 cells. Bisulphite sequencing analysis. Each circle represents a CpG dinucleotide. Open (white) circles denote unmethylated CpG sites; filled (black) circles indicate methylated CpG sites. Each row represents a single clone; for each cell line, six clones were sequenced. The region(s) of the promoters analyzed is shown. The position of the transcription start-site is indicated by the arrow, and positions of the CpG dinucleotides are shown to scale by vertical lines. Exons and introns are indicated by gray thick and thin lines, respectively.

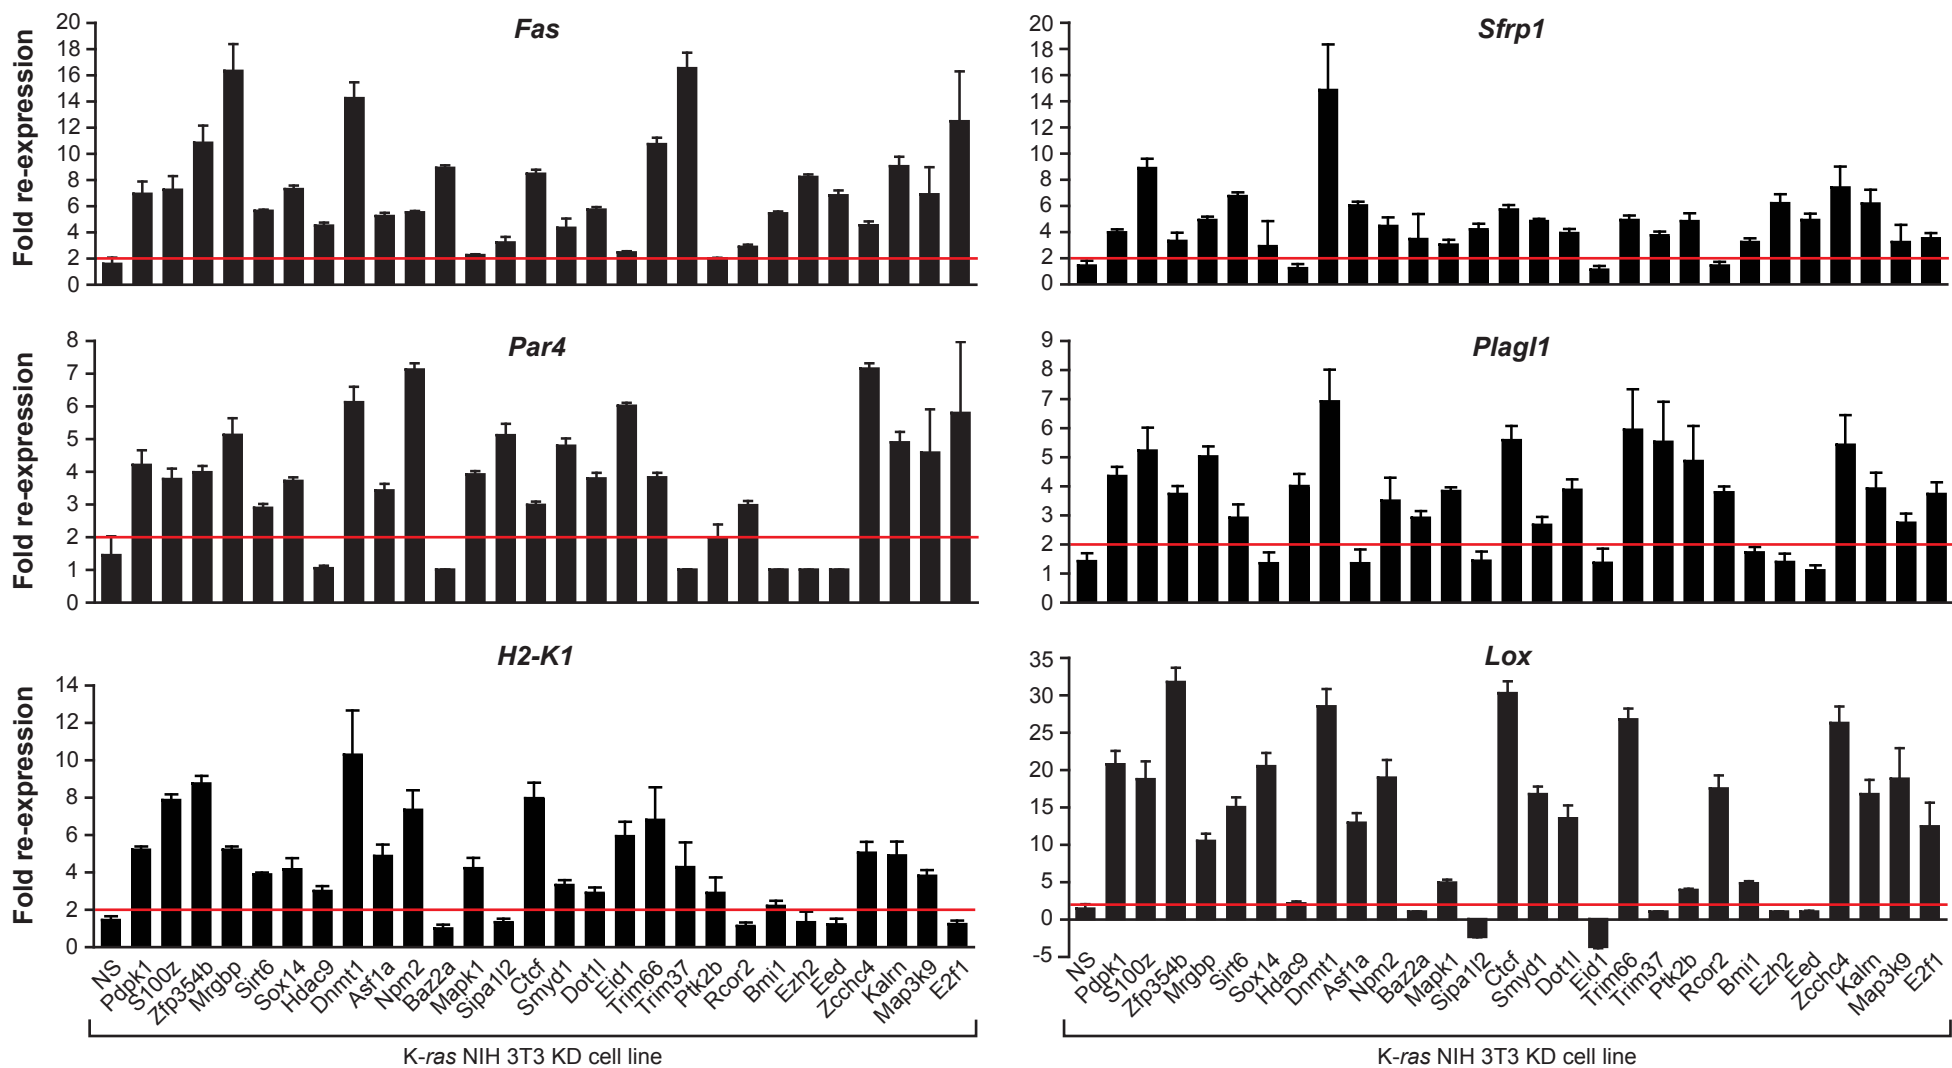

**Supplementary Figure 10 Ras directs epigenetic silencing of multiple, unrelated genes through a largely common pathway.** Quantitative real-time RT-PCR (qRT-PCR) analysis monitoring re-expression of *Fas*, *Sfrp1*, *Par4*, *Plagl1*, *H2-K1* and *Lox* following knockdown of each of the 28 RESEs. NS, nonsilencing shRNA. Values are expressed as fold re-expression relative to expression of the gene in K-*ras* NIH 3T3 cells. The red line indicates 2-fold re-expression. Error bars indicate standard error.

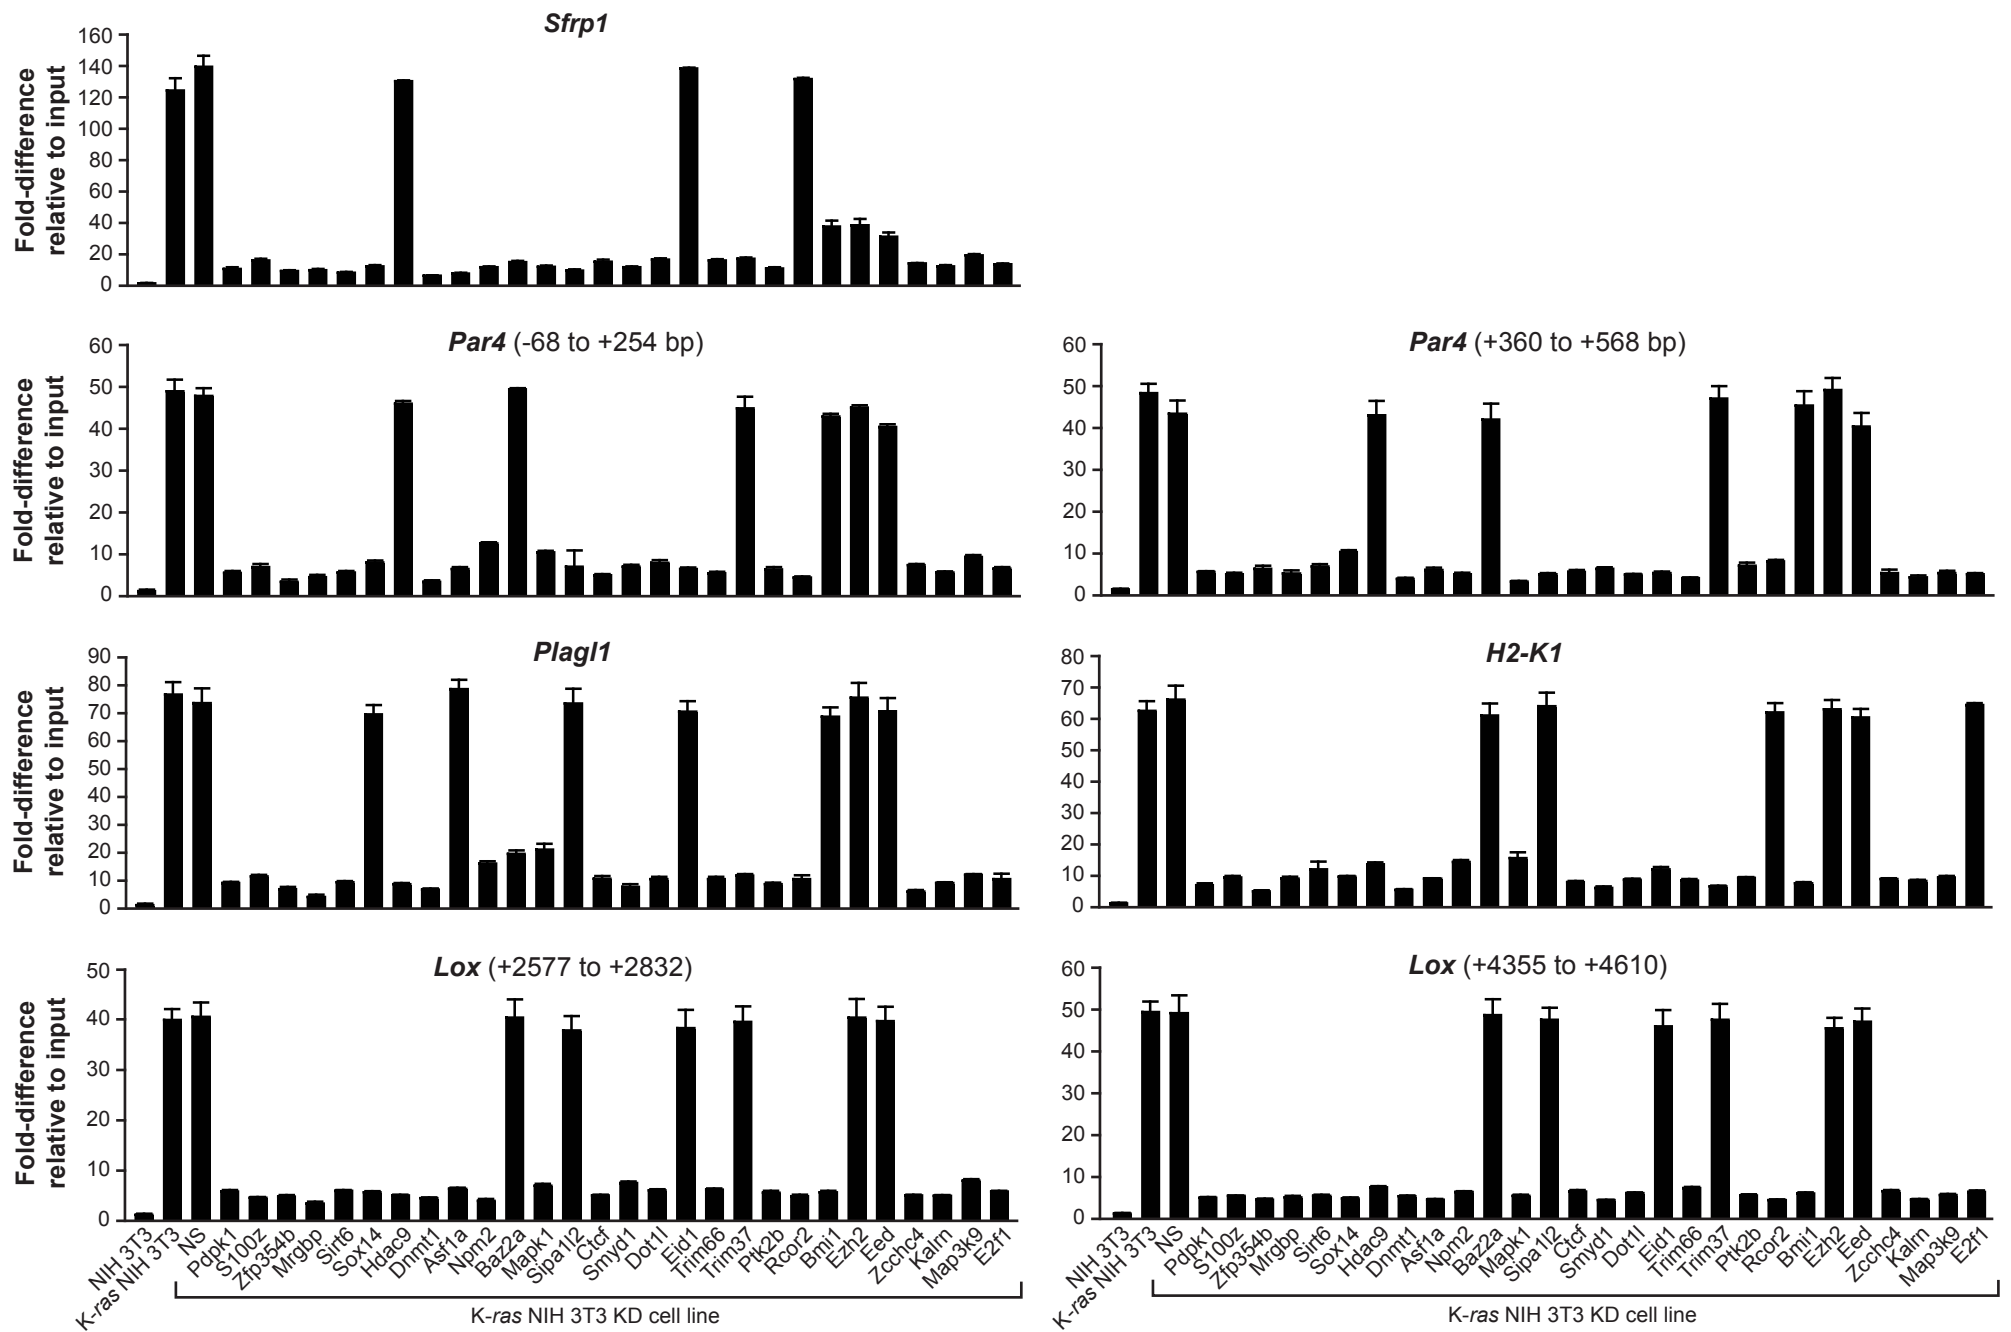

**Supplementary Figure 11 MeDIP analysis of the *Sfrp1*, *Par4*, *Plag1*, *H2-K1*, and *Lox* hypermethylated regions following knock-down of each of the 28 RESEs.** MeDIP analysis following knockdown of each of the 28 RESEs. NS, nonsilencing shRNA. Values are expressed as the fold-difference relative to input, and have been corrected for background.

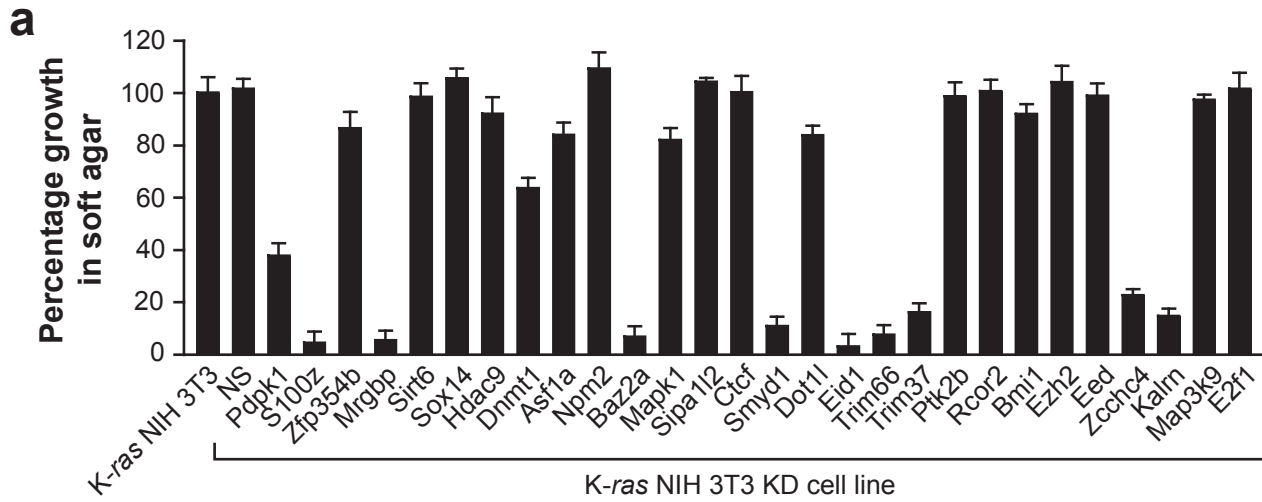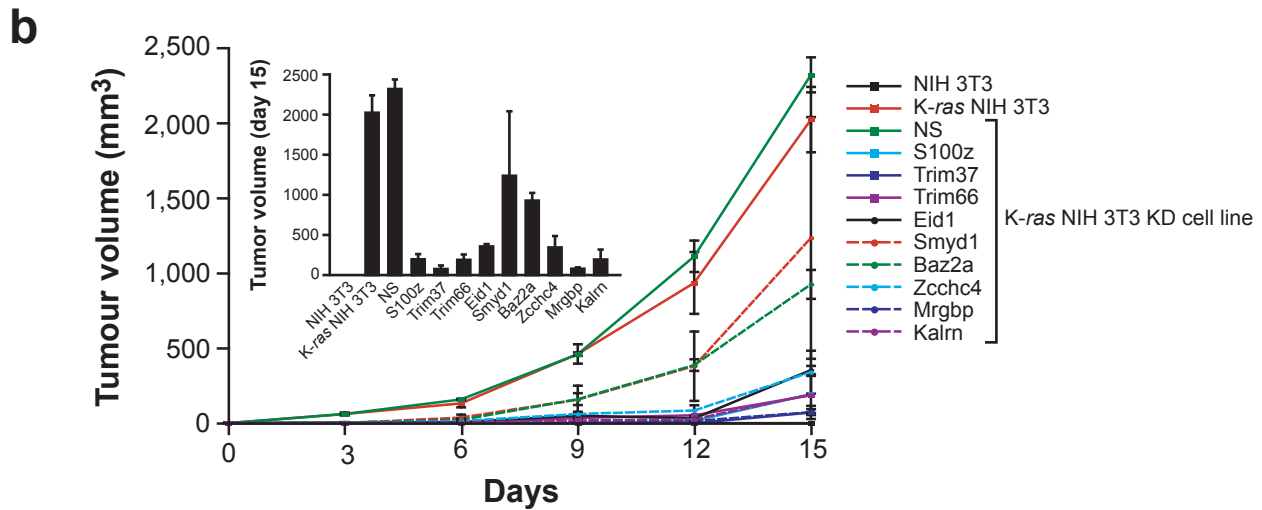

**Supplementary Figure 12 Requirement of factors involved in Ras-mediated epigenetic silencing for a fully transformed phenotype.** **a**, Soft agar growth assay. The 28 K-ras NIH 3T3 KD cell lines were tested for their ability to grow in soft agar. NS, nonsilencing shRNA. Values are expressed as percentage growth relative to parental K-ras NIH 3T3 cells. Error bars indicate standard error (n=3). **b**, Tumour formation assay. Each of the indicated K-ras NIH 3T3 KD cell lines was subcutaneously injected into the flanks of nude mice, and tumour volume was measured every 3 days for 15 days (n=3 mice per time point). Error bars indicate standard error (n=3 mice per time point).

**Supplementary Table 1 | Source ID numbers and clone locations for shRNAs obtained from Open Biosystems, and sequences of synthesized shRNAs**

| Gene           | Source ID   | Clone Location |
|----------------|-------------|----------------|
| <i>Asf1a</i>   | V2MM_64136  | SM2244-F-6     |
|                | V2MM_71706  | SM2238-A-2     |
| <i>Baz2a</i>   | V2MM_85159  | SM2467-F-2     |
|                | V2MM_85157  | SM2108-H-8     |
| <i>Bmi1</i>    | V2MM_10594  | SM2169-C-12    |
| <i>Ctcf</i>    | V2MM_190309 | SM2165-B-1     |
|                | V2MM_192417 | SM2165-D-3     |
| <i>Dnmt1</i>   | V2MM_46797  | SM2437-D-12    |
| <i>Dot1l</i>   | V2MM_193454 | SM2256-A-8     |
| <i>Eed</i>     | V2MM_73225  | SM2174-G-7     |
|                | V2MM_65179  | SM2009-A-7     |
| <i>Eid1</i>    | V2MM_61927  | SM2214-G-10    |
|                | V2MM_70375  | SM2020-A-12    |
| <i>Ezh2</i>    | V2MM_30422  | SM2432-E-11    |
|                | V2MM_35988  | SM2396-F-7     |
| <i>E2f1</i>    | V2MM_28115  | SM2433-F-2     |
|                | V2MM_32206  | SM2167-C-12    |
| <i>Hdac9</i>   | V2MM_159316 | SM2202-A-4     |
| <i>Kalrn</i>   | V2MM_160069 | SM2130-E-7     |
|                | V2MM_84498  | SM2144-F-10    |
| <i>Mapk1</i>   | V2MM_132158 | SM2106-G-2     |
|                | V2MM_34173  | SM2396-E-11    |
| <i>Map3k9</i>  | V2MM_70200  | SM2012-G-9     |
|                | V2MM_63859  | SM2011-A-5     |
| <i>Mrgbp</i>   | V2MM_202249 | SM2487-E-6     |
|                | V2MM_105745 | SM2162-H-1     |
| <i>Npm2</i>    | V2MM_93385  | SM2265-E-1     |
|                | V2MM_93381  | SM2471-D-1     |
| <i>Pdpc1</i>   | V2MM_78532  | SM2021-G-9     |
|                | V2MM_75859  | SM2004-F-9     |
| <i>Ptk2b</i>   | V2MM_26156  | SM2434-B-11    |
|                | V2MM_21947  | SM2187-E-10    |
| <i>Rcor2</i>   | V2MM_2246   | SM2385-A-12    |
|                | V2MM_7624   | SM2604-D-5     |
| <i>Sipa1l2</i> | V2MM_130034 | SM2106-D-2     |
|                | V2MM_130033 | SM2358-E-1     |
| <i>Sirt6</i>   | V2MM_93633  | SM2139-G-10    |
|                | V2MM_93636  | SM2451-H-4     |
| <i>Smyd1</i>   | V2MM_74820  | SM2167-E-4     |
|                | V2MM_74911  | SM2181-A-12    |
| <i>Sox14</i>   | V2MM_193113 | SM2507-D-4     |
|                | V2MM_193113 | SM2298-G-2     |
| <i>S100z</i>   | V2MM_150368 | SM2059-C-3     |
|                | V2MM_150367 | SM2032-G-11    |

|                |             |            |
|----------------|-------------|------------|
| <i>Trim37</i>  | V2MM_95365  | SM2143-F-9 |
|                | V2MM_226566 | SM2464-A-3 |
| <i>Trim66</i>  | V2MM_193395 | SM2269-B-4 |
|                | V2MM_93826  | SM2255-H-9 |
| <i>Zcchc4</i>  | V2MM_107407 | SM2612-F-6 |
|                | V2MM_202115 | SM2496-B-8 |
| <i>Zfp354b</i> | V2MM_70272  | SM2007-F-3 |
|                | V2MM_70504  | SM2026-C-5 |

| Gene         | Sequence (5' → 3')                                                                                     |
|--------------|--------------------------------------------------------------------------------------------------------|
| <i>Bmi1</i>  | TGCTGTTGACAGTGAGCGCGCAGATGAGGAGAAGAGGATTTAGTGAAGCCACAGATGTA<br>AATCCTCTTCTCCTCATCTGCATGCCTACTGCCTCGGA  |
| <i>Dnmt1</i> | TGCTGTTGACAGTGAGCGCGCCATCCTCAGGGACCATATTAGTGAAGCCACAGATGTA<br>ATATGGTCCCTGAGGATGGGCTTGCCTACTGCCTCGGA   |
| <i>Dot1l</i> | TGCTGTTGACAGTGAGCGCGGAGCGATTTCGCAAACATGAATAGTGAAGCCACAGATGTA<br>TTCATGTTTGCGAATCGCTCCTTGCCTACTGCCTCGGA |
| <i>Hdac9</i> | TGCTGTTGACAGTGAGCGCGGACATTTAATTCTGAGATTATAGTGAAGCCACAGATGTA<br>TAATCTCAGAATTAATGTCCTTGCCTACTGCCTCGGA   |

**Supplementary Table 2 | Primer sequences for bisulphite sequencing, methylated DNA immunoprecipitation, chromatin immunoprecipitation and quantitative real-time RT-PCR analyses**

**Bisulphite sequencing**

| Gene          | Position (relative to TSS) | Primer name      | Forward or reverse primer | Sequence (5' → 3')                    |
|---------------|----------------------------|------------------|---------------------------|---------------------------------------|
| <i>Fas</i>    | -30/+260                   | FASU2            | forward                   | GTTGTAGATATGTTGTGGATTTGGGTTG          |
|               |                            | FASR3D2          | reverse                   | CTAAACAATCTATAAACCAAAATCCCTCTC        |
|               |                            | FASR3U1 (nested) | forward                   | GGGTTGTTTTGTTTTGGTAAGTTTTG            |
|               |                            | FASR3D1 (nested) | reverse                   | CCAAAATCCCTCTCCAACCATACT              |
|               | +260/+623                  | FASR4U2          | forward                   | GGAGAGGGATTTTGGTTTATAGATTTG           |
|               |                            | FASR4D2          | reverse                   | CCATCCACAATTTAACAACCTCAATTCC          |
|               |                            | FASR4D1 (nested) | forward                   | AAATATCCACCAATTCAACCATCCAC            |
|               |                            | FASR4U1 (nested) | reverse                   | GTATGGTTGGAGAGGGATTTTGGT              |
|               | -2633/-2362                | FAS2.6U          | forward                   | GAAAAGAAGTAGAAATAGAAGTTGAG            |
|               |                            | FAS2.6D          | reverse                   | CTACATCCCAACTATAACTTTACTAC            |
|               | -6212/-5970                | FAS6.2U          | forward                   | GTTTGGTTTATAGTTATAGAGTAGAG            |
|               |                            | FAS6.2D          | reverse                   | CACTAAAAACATCATTACTTACACTAACC         |
| <i>H2-K1</i>  | -150/+295                  | H2K1U1           | forward                   | GTGAGGTTAGGGGTGGGGGAAGTTTA            |
|               |                            | H2K1D1           | reverse                   | CTCTTAACCTCTATATCTACTCCTC             |
|               |                            | H2K1U2 (nested)  | forward                   | GTTTTATTTTTGTTTTAATTTGGGTTAGG         |
|               |                            | H2K1D2 (nested)  | reverse                   | AAATACCTCAACAAATATAAACCTAAAAA         |
| <i>Lox</i>    | +2577/+2632                | LOXe3U1          | forward                   | AGGGAGGGGGTTGTTAGGATTTTG              |
|               |                            | LOXe3U2 (nested) | forward                   | GTTGTTAGGATTTTGTGATGGTGAGTTG          |
|               |                            | LOXe3D1          | reverse                   | TAACAACCACCCTCTCTCCTTTCACTC           |
|               |                            | LOXe3D2 (nested) | reverse                   | CACCCCAAATAAAAAACCCATTCACTTAC         |
|               | +4355/+4610                | LOXe4U1          | forward                   | GGAAGTTATTTAGTATTTTTATTGTTTTGTTTATGTG |
|               |                            | LOXe4U2 (nested) | forward                   | GTTGTTTTTTTTGTTGTGTGGGATATTAGATA      |
|               |                            | LOXe4D1          | reverse                   | CAACAACCTAACTTACTATCACTTTTCCTA        |
|               |                            | LOXe4D2 (nested) | reverse                   | TCCAAATATCAAAAAACCTACCTACCTA          |
| <i>Par4</i>   | +360/+568                  | R4F              | forward                   | TTAGGAAAGGTAAGGGGTAGAT                |
|               |                            | R4D              | reverse                   | CAATCATTTACTCCAAATAAACTCCATC          |
|               | -68/+254                   | PARTSU           | forward                   | AGTTAGGGATTGTTTTAGTTTAGG              |
|               |                            | PARTSD           | reverse                   | CACAACCTCCCRAAACTCCCATTCC             |
| <i>Plagl1</i> | -89/+306                   | PLAGLU           | forward                   | ATTTGTTATTTAGTTTGGGTTGGGAT            |
|               |                            | PLAGLD           | reverse                   | CTACATCTCTAACTACAACCTAAAACAC          |
| <i>Sfrp1</i>  | -218/+516                  | SFRPU1           | forward                   | GAAAGTATTTGTTTAGTTTTGGTTTTG           |
|               |                            | SFRPD1           | reverse                   | CAAATTAACAACACCATTCTTATAACC           |
|               |                            | SFRPU2 (nested)  | forward                   | GTTTTGTTTTTAAAGGGGTGTTGAT             |
|               |                            | SFRPD2 (nested)  | reverse                   | TTATAACACAACCTCAAATCCAC               |

## Methylated DNA immunoprecipitation (MeDIP)

| Gene          | Position relative to TSS | Forward or reverse primer | Sequence (5' → 3')     |
|---------------|--------------------------|---------------------------|------------------------|
| <i>Fas</i>    | -14 bp                   | forward                   | CAGCCCAGAGTAACTCACTTC  |
|               | +500 bp                  | reverse                   | CATACCCACAGGCAGTCTAGA  |
|               | -2.6 kb                  | forward                   | GAAGTAGAAACAGAAGCTGAG  |
|               | -2.3 kb                  | reverse                   | TTGCTACATCCCAACTGTAAC  |
|               | -6.2 kb                  | forward                   | GGTCTACAGCCACAGAGCAGA  |
|               | -5.9 kb                  | reverse                   | TCTTCTGTCACTAGAGGGCATC |
| H2-K1         | -50 bp                   | forward                   | GCCACTGGTTATAAAGTCCA   |
|               | +125 bp                  | reverse                   | AAAGCTGTTTCCCTCCCGAC   |
| <i>Lox</i>    | +2.6 kb                  | forward                   | GCTGCTAGGACCTTGTGATGG  |
|               | +2.8 kb                  | reverse                   | CACCCAGATGAGAGGCCCA    |
|               | +4.4 kb                  | forward                   | GCTGTTTCTTTGTTGTGTTGGG |
|               | +4.6 kb                  | reverse                   | TCCAGATGTCAGGGGACCTGC  |
| <i>Par4</i>   | -47 bp                   | forward                   | CAGCCCGCGAGTTTGCCGG    |
|               | +90 bp                   | reverse                   | TGCGGGTGGCCCGGAAGAGC   |
|               | +365 bp                  | forward                   | GATCGAGAAGAGGAAGCTGC   |
|               | +570 bp                  | reverse                   | TCTGGGTCGGGGTAACTTCC   |
| <i>Plagl1</i> | -36 bp                   | forward                   | CGCCCCGAGCCTTGATTTAG   |
|               | +184 bp                  | reverse                   | ACTCAGGCGTCGCCGTCAGA   |
| <i>Sfrp1</i>  | -68 bp                   | forward                   | CTGATTGGCTGCGCGCGGGG   |
|               | +182 bp                  | reverse                   | GCAGTGCCGGGCCCCGTCCG   |

## Chromatin immunoprecipitation (ChIP)

### *Fas* promoter

| Region | Forward or reverse primer | Sequence (5' → 3')     | Position relative to TSS |
|--------|---------------------------|------------------------|--------------------------|
| CP/TSS | forward                   | GCCGCCTGTGCAGTGGTGA    | -234                     |
|        | reverse                   | CTGTGTGTGGGCAGCCTGCGGC | +20                      |
| ~ 1kb  | forward                   | GGCTATAGATCACCTTCATGTA | - 967                    |
|        | reverse                   | GCAGTAACTCAGGGACCAAG   | - 722                    |
| ~ 2kb  | forward                   | GCGTTGCCATAGCATGAACT   | - 2330                   |
|        | reverse                   | GAGTTAGGGGACCATAGTCA   | - 2053                   |

### Gamma satellite DNA

| Forward or reverse primer | Sequence (5' → 3')    |
|---------------------------|-----------------------|
| forward                   | TATGGCGAGGAAAAGTAAA   |
| reverse                   | TTCACGTCCTAAAGTGTGTAT |



## Quantitative real-time RT-PCR (qRT-PCR)

| Gene          | Forward or reverse primer | Sequence (5' → 3')      |
|---------------|---------------------------|-------------------------|
| <i>Asf1a</i>  | forward                   | GGCAAAGGTTTCAGGTGAACAAT |
|               | reverse                   | GGATGAGTCCTGCATTCCGGAG  |
| <i>Baz2a</i>  | forward                   | CACTCCTCTAGCACCTCACAC   |
|               | reverse                   | GGTGATGGAGGTGTGAGGTG    |
| <i>Bmi1</i>   | forward                   | TCGGCCAACTTGCAAAGAA     |
|               | reverse                   | GGGACTGGCAAACAGGAAG     |
| <i>Ctcf</i>   | forward                   | CACGGGGGAGAAGCCTTATG    |
|               | reverse                   | CGGGTGAATGTTTTCCACA     |
| <i>Dnmt1</i>  | forward                   | GAACCATCACCGTGCGAGAC    |
|               | reverse                   | CCAGTGGGCTCATGTCCTTG    |
| <i>Dot1l</i>  | forward                   | CCACCCATACCAGGACCAT     |
|               | reverse                   | CTGCTGGGCTCATCCTCAGA    |
| <i>Eed</i>    | forward                   | CGAGAGGGGAAGTGTCTGACTG  |
|               | reverse                   | GCCTCCCTCCAGGTTCTTGC    |
| <i>Eid1</i>   | forward                   | ACCTTGGTTCGAGTCGCTTCC   |
|               | reverse                   | AACTCGTCGCCTTCCAGGTC    |
| <i>Ezh2</i>   | forward                   | GTAGCATTACGCGGGGCTCT    |
|               | reverse                   | GGGTTGCATCCACCACAAA     |
| <i>E2f1</i>   | forward                   | GGCTGGATCTGGAGACTGACC   |
|               | reverse                   | CTGCACCTTCAGCACCTCAG    |
| <i>Fas</i>    | forward                   | GATGCACACTCTGCGATGAAG   |
|               | reverse                   | CAGTGTTACAGCCAGGAGAAT   |
| <i>Hdac9</i>  | forward                   | GCAGTCCAGGGAGCTAGACG    |
|               | reverse                   | GAGCTGATCATACTGTGCTAAG  |
| <i>H2-K1</i>  | forward                   | GAGCAGTGGTCCGAGTGA      |
|               | reverse                   | GGTCTTCGTTTCAGGGCGATG   |
| <i>Kalrn</i>  | forward                   | CCTGGACCTGTTGCTGATGG    |
|               | reverse                   | CTGGAGCACAGCTGCAGTCA    |
| <i>Lox</i>    | forward                   | CTCATCTGCCTGAAAGCACAC   |
|               | reverse                   | GGGCAAAGAGGTACATCGAAG   |
| <i>Mapk1</i>  | forward                   | ACAGAGTCCTCCCCGTCTGC    |
|               | reverse                   | GCATGTTTGGGTGCCATCAT    |
| <i>Map3k9</i> | forward                   | AAGAGGATTCCCCGGACAT     |
|               | reverse                   | ACACATCGCTGCCTTTGGAA    |
| <i>Mrgbp</i>  | forward                   | ACAAGCCTGTCGGGGTGAAT    |
|               | reverse                   | ACTGTGGGGGTCCACATCCT    |
| <i>Npm2</i>   | forward                   | GGAGCCCTGAAGCCATATTGAG  |
|               | reverse                   | GGCCTCTAAAGGTGCAAGTCT   |
| <i>Par4</i>   | forward                   | CCCCGAACAGACAGAAGTGGT   |
|               | reverse                   | CTTGATCAGCCTCACAAAGTC   |
| <i>Pdpk1</i>  | forward                   | GCAACTACGACAATCTCCTG    |
|               | reverse                   | CCTTTTCGCTTATCCACTGGA   |
| <i>Plagl1</i> | forward                   | GCAGCCACAGTTTCAGTTGC    |
|               | reverse                   | CTCTGGCTCTGGCTCAGGAT    |
| <i>Ptk2b</i>  | forward                   | TCCAGCAGACCTTCCAGCAG    |
|               | reverse                   | CCTTTAGGGCCGATGACCAG    |
| <i>Rcor2</i>  | forward                   | TGGGGCTATTGCAGAGGTGA    |
|               | reverse                   | CTGCTCAGCCTCCCATTCT     |

|                |         |                       |
|----------------|---------|-----------------------|
| <i>Sfrp1</i>   | forward | CATCCATGGGGCTACAGTGA  |
|                | reverse | TGGCATGGTGAATTTTCAGG  |
| <i>Sipa1l2</i> | forward | CTCGTCGTGGCCTCAGAGAA  |
|                | reverse | TGTGACGGCCTTGGATCACT  |
| <i>Sirt6</i>   | forward | CTTCCCCAGGGACAACTGG   |
|                | reverse | CGGATCTGCAGCGATGTACC  |
| <i>Smyd1</i>   | forward | TGGAGAAGCAGGAGCCAGTG  |
|                | reverse | TTGGTAAGCCCTGCCCTCAT  |
| <i>Sox14</i>   | forward | GGTGAAGAGGGAGCGAAGGA  |
|                | reverse | CTGTGGGCACCAGAGATTGG  |
| <i>S100z</i>   | forward | GCTGGAGATGGCTATGGACAC |
|                | reverse | GCAACCGTCAGAGCTGCCAC  |
| <i>Trim37</i>  | forward | GGAGAAATTGCGGGATGCTC  |
|                | reverse | GCCCAACGACAGTTCACCAG  |
| <i>Trim66</i>  | forward | TTTCGTCTGGCCAACAGCAT  |
|                | reverse | CTGAAGGATGGGGAGGGATG  |
| <i>Zcchc4</i>  | forward | AGCTTGGAAGGCCAGTCAG   |
|                | reverse | GCCTTGGTGCTCCAACACAC  |
| <i>Zfp354b</i> | forward | GGATGAGTGGAAGAAGCTGG  |
|                | reverse | CTCCTTGTTGCAACACGGAG  |

## SUPPLEMENTARY METHODS

**Cell lines and culture conditions.** Human HEC1A and HEC1A $\Delta$ *ras* derivative cells (a gift from T. A. Waldman, Georgetown University, USA) were maintained in McCoy's medium supplemented with 10% fetal calf serum (FCS) at 37°C and 5% CO<sub>2</sub>. Murine C3H10T1/2 cells stably transfected with activated human Ha-*ras* (C3H10T1/2-Ras) and their control counterparts (C3H10T1/2-Neo) (a gift from E. J. Taparowsky, Purdue University, USA) and COS-M6 cells (generously provide by M. Koken, CNRS, France) were maintained in Dulbecco's modified Eagle's medium (DMEM) supplemented with 10% FCS. For 5-aza-2'-deoxycytidine (5-aza) treatment, cells were treated with 10  $\mu$ M 5-aza for 72 h.

**Plasmids.** The human ZFP354B open reading frame (accession number BC112111.1) was cloned into the vector PEF6V5b (source) in frame with the C-terminal V5 tag. The PEST sequence deletion derivative ( $\Delta$ PEST), in which amino acids 80-102 were deleted, was derived by PCR using the wild-type expression vector as the substrate, Pfu DNA polymerase (Stratagene) and the following primers: ZD1 (forward), 5'-GAGAAA GATGCCGGCGGATTTTCAGGAGCAGATAAGGAAAAGATTG-3' and ZD2 (reverse), 5'-CTCCTGAAATCCGCCGGCATCTTTCTCCACCTCCCAGGGATC-3'. The plasmids pBABE-puro and pBABE-puro-KRASV12 were obtained from Addgene.

**Immunoblot analysis.** Extract preparation and immunoblot analysis were performed essentially as described in the Methods section accompanying the main text. The PI3K inhibitor LY294002 (LC Laboratories) was added at a concentration of 25  $\mu$ M for 24 h. Transient cotransfections in COS-M6 cells were performed using Effectene (Qiagen) and, after 24 h, cells were serum-starved for 12 h prior to extract preparation. Antibodies were obtained as follows: anti-ZFP354B antibody (raised against a synthetic peptide corresponding to amino acids 126-143 of the murine protein, and affinity

purified on a peptide coupled to agarose), anti-Actin (A-5106; Sigma) and anti-Tubulin (T-5368; Sigma).

**Quantitative real time RT-PCR.** Total RNA was isolated using TRIZOL (Invitrogen) 7 days following retroviral transduction and puromycin selection. Reverse transcription was performed using SuperScript II Reverse Transcriptase (Invitrogen) as per the manufacturer's instructions, followed by quantitative real-time PCR as described above. The sequences of the primers used for quantitative real-time PCR are provided in Supplemental Table 2.

**Chromatin immunoprecipitation (ChIP).** ChIP assays were performed as described in the Methods section accompanying the main paper, using antibodies anti-DNMT3A (IMG-268A; Imgenex) and anti-DNMT3B (Ab2851; Abcam). The sequences of the primers used for amplifying the ChIP products are provided in Supplementary Table 2. ChIP products were visualized by autoradiography, or analyzed by quantitative real-time PCR using Platinum SYBR Green qPCR SuperMix-UDG with Rox (Invitrogen). Calculation of fold-differences was done as previously described<sup>3</sup>.

### Supplementary References

1. Kim, J. S., Lee, C., Foxworth, A. & Waldman, T. B-Raf is dispensable for K-Ras-mediated oncogenesis in human cancer cells. *Cancer Res.* **64**, 1932-1937 (2004).
2. Bachman, K. E., Rountree, M. R. & Baylin, S. B. Dnmt3a and Dnmt3b are transcriptional repressors that exhibit unique localization properties to heterochromatin. *J. Biol. Chem.* **276**, 32282-32287 (2001).
3. Pfaffl, M. W. A new mathematical model for relative quantification in real-time RT-PCR. *Nucleic Acids Res.* **29**, e45 (2001).
